# Supplementary material for: Tuning social interactions’ strength drives collective response to light intensity in schooling fish
Source: PubMed Central journal article supplement (PMC10691717; doi:10.1371/journal.pcbi.1011636), 2023-11-17

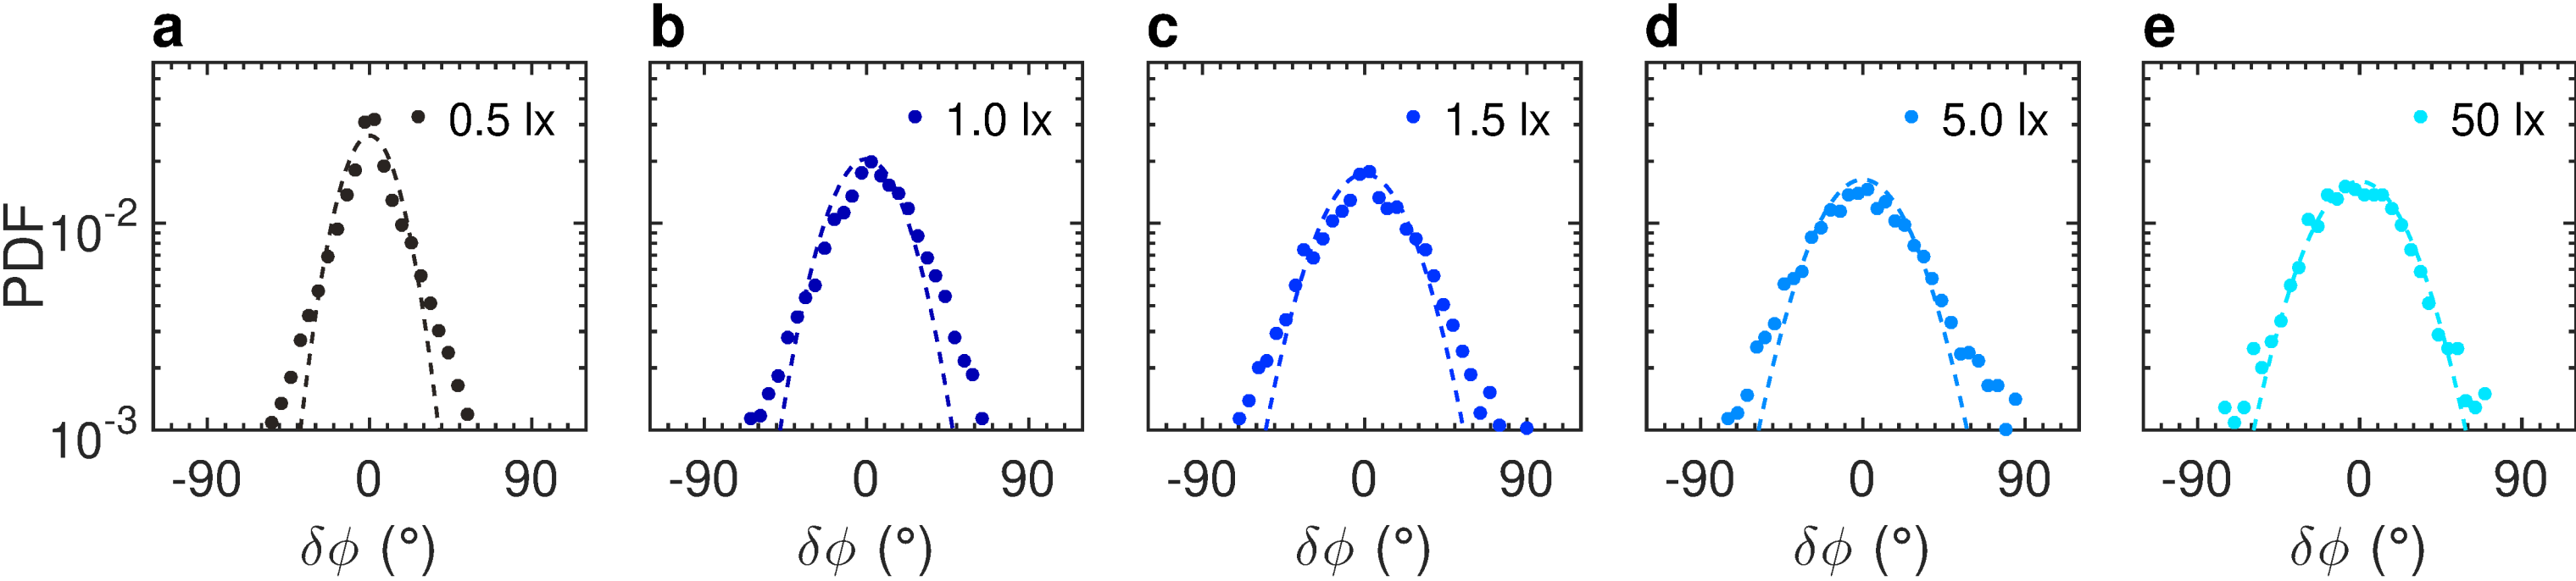

Supplement: pcbi.1011636.s023.pdf [file pcbi.1011636.s023.pdf]
